# Supplementary material for: Factors associated with complication of cranioplasty: CT-Based Risk assessment for Early Failure of Autologous-Bone Cranioplasty
Source: Research Square preprint supplement (doi:10.21203/rs.3.rs-7348858/v1), 2025-10-21
Supplement: Supplementary file 1 [file 47252797b8a323ab707fff1f.docx]

**Tables**

**Table 1.** Baseline demographics, etiology of craniectomy, and preoperative comorbidities.

| **Characteristic** | **Total (n=376)** | **No revision (n=324)** | **Revision Surgery (n=52)** | | P value |
| --- | --- | --- | --- | --- | --- |
| **Age, years (mean ± SD)** | 48.9 ± 17.8 | 48.9 ± 17.4 | 49.5 ± 19.9 | | 0.8 |
| **Sex - male, n (%)** | 267 (71.0) | 227 (70.1) | 40 (76.9) | | 0.31 |
| **Hypertension, n (%)** | 65 (17.3) | 58 (17.9) | 7 (13.5) | | 0.554 |
| **Diabetes mellitus, n (%)** | 45 (12.0) | 36 (11.1) | 9 (17.3) | | 0.247 |
| **Antiplatelet use, n (%)** | 18 (4.8) | 11 (3.4) | 7 (13.5) | | 0.006 |
|  |  |  |  |  |  |
| **Etiology of decompressive craniectomy (overall distribution)** | | | | **n (%)** | |
| Acute subdural hematoma | | | | 111 (29.5) | |
| Traumatic intracerebral hemorrhage | | | | 104 (27.7) | |
| Spontaneous intracerebral hemorrhage | | | | 51 (13.6) | |
| Spontaneous subarachnoid hemorrhage | | | | 43 (11.4) | |
| Acute cerebral infarction | | | | 36 (9.6) | |
| Epidural hematoma | | | | 31 (8.2) | |

**Table 2.** Preoperative radiological findings by revision status.

| **Variable** | **No revision (n=324)** | **Revision Surgery (n=52)** | **Odds Ratio (95% CI**†**)** | **P value** |
| --- | --- | --- | --- | --- |
| **EM area, mm² (mean ± SD)** | 667 ± 620 | 1653 ± 1026 |  | 0.001* |
| **EM involving ≥2 lobes, n (%)** | 77 (23.8) | 30 (57.7) | 4.37 (2.38–8.02) | 0.001 |
| **Sinking skin flap, n (%)** | 55 (17.0) | 29 (55.8) | 6.17 (3.32–11.5) | 0.001 |
| **Hydrocephalus, n (%)** | 63 (19.4) | 24 (46.2) | 3.35 (1.93–6.54) | 0.001 |
| **Subdural hygroma, n (%)** | 20 (6.2) | 8 (15.4) | 2.76 (1.15–6.65) | 0.02 |

*At a cutoff of EM area ≥ 620 mm², the odds of reoperation were significantly higher (OR 14.03, 95% CI 5.43–36.21; p < 0.001; 47/52 vs. 130/324), providing high sensitivity for high-risk patient identification.

†CI: Confidence interval
